# Supplementary material for: An Overview of Tick-Borne Encephalitis Epidemiology in Endemic Regions of Continental Croatia, 2017–2023
Source: MDPI journal article supplement (doi:10.3390/microorganisms12020386), 2024-02-13
Supplement: s1 [file s1]

Table S1. Seasonal distribution of *Ixodes ricinus* ticks

| County<br>(County number) | Months |     |     |      |      |     |      |    |     |     |     |
|---------------------------|--------|-----|-----|------|------|-----|------|----|-----|-----|-----|
|                           | II     | III | IV  | V    | VI   | VII | VIII | IX | X   | XI  | XII |
| Zagreb County (20)        |        |     | 109 | 164  | 43   |     |      |    | 10  |     |     |
| Sisak-Moslavina (3)       |        |     |     | 7    |      |     |      | 2  | 11  | 10  | 13  |
| Karlovac (4)              |        | 17  | 16  | 13   | 6    | 38  | 22   | 15 | 17  |     |     |
| Varaždin (5)              |        |     |     |      | 118  |     |      |    |     |     |     |
| Koprivnica-Križevci (6)   |        |     | 56  |      | 52   | 13  |      |    | 8   |     |     |
| Bjelovar-Bilogora(7)      |        | 6   | 5   | 57   |      | 48  | 2    | 9  |     | 7   |     |
| Primorje-Gorski Kotar (8) |        | 12  | 20  | 1199 | 2095 | 470 | 132  |    | 167 | 3   |     |
| Lika-Senj (9)             |        |     |     |      |      |     |      |    |     |     | 2   |
| Virovitica-Podravina (10) |        |     |     | 13   | 20   |     |      |    | 5   |     |     |
| Požega-Slavonia (11)      |        |     |     |      | 320  | 19  |      |    | 42  | 22  |     |
| Osijek-Baranja (14)       | 18     | 177 | 368 | 693  | 92   | 86  | 55   |    | 61  | 242 | 76  |
| Vukovar-Srijem (16)       |        | 85  | 45  | 21   |      | 5   |      |    |     |     |     |
| Međimurje (20)            |        |     |     |      | 193  |     |      |    | 3   |     |     |
| Zagreb City (21)          |        |     | 223 | 699  | 26   | 2   |      |    | 146 |     |     |
| Total N                   | 18     | 297 | 842 | 2866 | 2965 | 681 | 211  | 26 | 470 | 284 | 91  |
